# Supplementary material for: Miocene Diversification and High-Altitude Adaptation of Parnassius Butterflies (Lepidoptera: Papilionidae) in Qinghai–Tibet Plateau Revealed by Large-Scale Transcriptomic Data
Source: MDPI journal article supplement (doi:10.3390/insects11110754), 2020-11-03
Supplement: s1 [file s1]

**Table 1.** Information of samples used for transcriptome sequencing.

| NO. | Subfamily/Tribe<br>/Genus                    | Subgenus           | Species                        | Main Host plant                                                               | Sampling<br>Location | Latitude/ Longitude | Main Altitude<br>Distribution |
|-----|----------------------------------------------|--------------------|--------------------------------|-------------------------------------------------------------------------------|----------------------|---------------------|-------------------------------|
| 1   | Parnassiinae/Parnassiini<br>i<br>/Parnassius | <i>Parnassius</i>  | <i>Parnassius epaphus</i>      | Crassulaceae ( <i>Rhodiola</i> ,<br><i>Sedum</i> )                            | Gansu, China         | N39.013/ E98.888    | 3,500 m~5,500 m, alpine       |
| 2   | Parnassiinae/Parnassiini<br>i<br>/Parnassius | <i>Parnassius</i>  | <i>Parnassius jacquemontii</i> | Crassulaceae ( <i>Rhodiola</i> )                                              | Qinghai, China       | N36.465/ E102.087   | 3,500 m~5,000 m, alpine       |
| 3   | Parnassiinae/Parnassiini<br>i<br>/Parnassius | <i>Tadumia</i>     | <i>Parnassius cephalus</i>     | Papaveraceae ( <i>Corydalis</i> )                                             | Qinghai, China       | N38.089/ E100.658   | >3,500 m, alpine              |
| 4   | Parnassiinae/Parnassiini<br>i<br>/Parnassius | <i>Kailasius</i>   | <i>Parnassius imperator</i>    | Papaveraceae ( <i>Corydalis</i> )                                             | Gansu, China         | N34.302/ E103.207   | 2,800 m~3500 m, alpine        |
| 5   | Parnassiinae/Parnassiini<br>i<br>/Parnassius | <i>Kailasius</i>   | <i>Parnassius acdestis</i>     | Papaveraceae ( <i>Corydalis</i> )                                             | Gansu, China         | N34.269/ E103.207   | 4,000 m~4,500 m, alpine       |
| 6   | Parnassiinae/Parnassiini<br>i<br>/Parnassius | <i>Kreizbergia</i> | <i>Parnassius simo</i>         | Scrophulariaceae and<br>Papaveraceae ( <i>Lagotis</i> ,<br><i>Corydalis</i> ) | Qinghai, China       | N38.089/ E100.658   | >4,000 m, alpine              |
| 7   | Parnassiinae/Parnassiini<br>i<br>/Parnassius | <i>Driopa</i>      | <i>Parnassius orleans</i>      | Papaveraceae ( <i>Corydalis</i> )                                             | Qinghai, China       | N36.4653/E102.08704 | 2,500 m~4,000 m, alpine       |
| 8   | Parnassiinae/Parnassiini<br>i<br>/Parnassius | <i>Driopa</i>      | <i>Parnassius glacialis</i>    | Papaveraceae ( <i>Corydalis</i> )                                             | Jiangsu, China       | N32.072/E118.837    | 200 m~1000 m, subalpine       |
| 9   | Parnassiinae/Zerynthiini/ <i>Sericanus</i>   | -                  | <i>Sericanus montelus</i>      | Aristolochiaceae                                                              | Anhui, China         | N31.348/ E118.383   | lowland                       |
| 10  | Papilioninae/Papilionini<br>i                | -                  | <i>Papilio polytes</i>         | Rutaceae                                                                      | Anhui, China         | N31.338/ E118.382   | lowland                       |

**Table 2.** Substitution model of each partition with different partitioning schemes.

| Dataset           | Scheme                         | Total Lenth                | Substitution Model (AICc) |         |
|-------------------|--------------------------------|----------------------------|---------------------------|---------|
|                   |                                |                            | ML                        | BI      |
| <b>Amino acid</b> | <b>unpartitioned</b>           | 145,077 aa, 476 genes      | JTT+I+G                   | mixed   |
| Codon             | unpartitioned                  | 145,077 codons, 476 genes  | GY+F+R4                   | codon   |
| Nucleotide        | partitioned by codon positions | 1st, 145,077 bp, 476 genes | GTR+I+G                   | GTR+I+G |
|                   |                                | 2nd, 145,077 bp, 476 genes | GTR+I                     | GTR+I   |
|                   |                                | 3rd, 145,077 bp, 476 genes | GTR+G                     | GTR+G   |

**Table 3.** Summary of assembly results of transcriptome data for species.

| Item                               | <i>Parnassius</i>   |                   |                     |                    |                    |                |                   |                        | <i>Sericanus</i>   | <i>papilio</i>    | Average of<br><i>Parnassius</i> |
|------------------------------------|---------------------|-------------------|---------------------|--------------------|--------------------|----------------|-------------------|------------------------|--------------------|-------------------|---------------------------------|
|                                    | <i>P. glacialis</i> | <i>P. orleans</i> | <i>P. imperator</i> | <i>P. accestis</i> | <i>P. cephalus</i> | <i>P. simo</i> | <i>P. epaphus</i> | <i>P. jacquemontii</i> | <i>S. montelus</i> | <i>p. polytes</i> |                                 |
| Total number of clean reads        | 58,078,158          | 67,887,602        | 64,578,298          | 66,997,138         | 61,256,404         | 68,702,470     | 62,749,958        | 65,243,576             | 56,253,056         | 60,880,890        | <b>64,436,701</b>               |
| Total length of clean data (Gbp)   | 8.50                | 9.87              | 9.32                | 9.75               | 8.98               | 9.83           | 9.02              | 9.48                   | 8.17               | 8.89              | <b>9.34</b>                     |
| <b>Final Assembly</b>              |                     |                   |                     |                    |                    |                |                   |                        |                    |                   |                                 |
| Total length of unigenes (Mbp)     | 18.20               | 32.34             | 16.92               | 16.55              | 23.20              | 22.91          | 17.85             | 30.14                  | 29.36              | 19.10             | <b>22.26</b>                    |
| Total number of unigenes           | 35,107              | 64,863            | 34,570              | 34,096             | 44,276             | 44,481         | 41,777            | 61,868                 | 60,642             | 30,870            | <b>45,130</b>                   |
| Maximum length of unigenes (bp)    | 18,973              | 14,591            | 7,711               | 10,693             | 10,026             | 9,118          | 11,167            | 15,257                 | 13,786             | 13,414            | <b>12,192</b>                   |
| Mean length of unigenes (bp)       | 518                 | 499               | 489                 | 485                | 524                | 515            | 427               | 487                    | 484                | 618               | <b>493</b>                      |
| N50 length of unigenes (bp)        | 658                 | 609               | 585                 | 584                | 655                | 648            | 452               | 584                    | 551                | 925               | <b>597</b>                      |
| Number of N50 sequences            | 6,747               | 13,903            | 7,775               | 7,443              | 9,546              | 9,302          | 9,302             | 13,193                 | 12,765             | 5,441             | <b>9,651</b>                    |
| GC%                                | 47.39               | 48.25             | 44.97               | 45.07              | 44.84              | 44.36          | 47.63             | 49.08                  | 47.94              | 48.98             | <b>46.45</b>                    |
| Total number of predicted proteins | 19,371              | 39,521            | 20,105              | 18,585             | 24,288             | 24,201         | 19,165            | 37,545                 | 30,627             | 19,845            | <b>25,348</b>                   |

bp = base pair; Gbp = billion base pairs; Mbp = mega base pairs.

**Table 4.** Summary of functional annotation of Unigenes.

| Database        | Parnassius   |            |            |            |              |            |             |            |             |            |         |            |            |            |                 |            | Sericius    |            | papilio    |            | Average(Parnassius) |            |
|-----------------|--------------|------------|------------|------------|--------------|------------|-------------|------------|-------------|------------|---------|------------|------------|------------|-----------------|------------|-------------|------------|------------|------------|---------------------|------------|
|                 | P. glacialis |            | P. orleans |            | P. imperator |            | P. acdestis |            | P. cephalus |            | P. simo |            | P. epaphus |            | P. jacquemontii |            | S. montelus |            | p. polytes |            |                     |            |
|                 | Number       | Percent(%) | Number     | Percent(%) | Number       | Percent(%) | Number      | Percent(%) | Number      | Percent(%) | Number  | Percent(%) | Number     | Percent(%) | Number          | Percent(%) | Number      | Percent(%) | Number     | Percent(%) | Number              | Percent(%) |
| Annotated       | 18,923       | 53.90      | 39,121     | 60.31      | 19,993       | 57.83      | 18,383      | 53.92      | 22,506      | 50.83      | 23,163  | 52.07      | 19,059     | 45.62      | 37,329          | 60.34      | 27,850      | 45.93      | 19,434     | 62.95      | 24,810              | 54.35      |
| NR              | 18,923       | 53.90      | 39,121     | 60.31      | 19,993       | 57.83      | 18,383      | 53.92      | 22,506      | 50.83      | 23,163  | 52.07      | 19,059     | 45.62      | 37,329          | 60.34      | 27,850      | 45.93      | 19,434     | 62.95      | 24,810              | 54.35      |
| Swissprot       | 12,505       | 35.62      | 30,817     | 47.51      | 12,366       | 35.77      | 11,687      | 34.28      | 16,784      | 37.91      | 15,670  | 35.23      | 10,728     | 25.68      | 29,546          | 47.76      | 23,468      | 38.70      | 13,659     | 44.25      | 17,513              | 37.47      |
| KEGG            | 4,415        | 12.58      | 10,086     | 15.55      | 5,243        | 15.17      | 4,948       | 14.51      | 6,545       | 14.78      | 6,158   | 13.84      | 4,326      | 10.35      | 9,563           | 15.46      | 7,104       | 11.71      | 5,572      | 18.05      | 6,411               | 14.03      |
| eggNOG          | 19,018       | 54.17      | 38,510     | 59.37      | 20,312       | 58.76      | 18,434      | 54.06      | 22,697      | 51.26      | 23,529  | 52.90      | 19,076     | 45.66      | 36,509          | 59.01      | 27,865      | 45.95      | 19,498     | 63.16      | 24,761              | 54.40      |
| GO              | 11,876       | 33.83      | 29,468     | 45.43      | 12,349       | 35.72      | 11,497      | 33.72      | 13,456      | 30.39      | 13,816  | 31.06      | 11,158     | 26.71      | 28,820          | 46.58      | 18,441      | 30.41      | 12,760     | 41.33      | 16,555              | 35.43      |
| In all database | 3,605        | 10.27      | 9,025      | 13.91      | 4,201        | 12.15      | 3,998       | 11.73      | 4,733       | 10.69      | 4,636   | 10.42      | 3,478      | 8.33       | 8,698           | 14.06      | 5,452       | 8.99       | 4,343      | 14.07      | 5,297               | 11.45      |
| Total annotated | 19,887       | 56.65      | 40,208     | 61.99      | 20,692       | 59.86      | 19,038      | 55.84      | 24,816      | 56.05      | 24,831  | 55.82      | 19,777     | 47.34      | 38,011          | 61.44      | 31,237      | 51.51      | 20,252     | 65.60      | 25,908              | 56.87      |
| Unannotated     | 15,220       | 43.35      | 24,655     | 38.01      | 13,878       | 40.14      | 15,058      | 44.16      | 19,460      | 43.95      | 19,650  | 44.18      | 22,000     | 52.66      | 23,857          | 38.56      | 29,405      | 48.49      | 10,618     | 34.40      | 19,222              | 43.13      |
| Total           | 35,107       | 100        | 64,863     | 100        | 34,570       | 100        | 34,096      | 100        | 44,276      | 100        | 44,481  | 100        | 41,777     | 100        | 61,868          | 100        | 60,642      | 100        | 30,870     | 100        | 45,130              | 100        |

**Table 5.** Results of cross-contamination check using the CroCo program.

| species                        | total_unigenes | nb_suspects† | nb_clean† | nb_lowcov† | nb_overexp† | nb_dubious† | nb_contam† | clean_percent† | lowcov_percent | overexp_percent | dubious_percent | contam_percent |
|--------------------------------|----------------|--------------|-----------|------------|-------------|-------------|------------|----------------|----------------|-----------------|-----------------|----------------|
| <i>Parnassius glacialis</i>    | 35107          | 15933        | 15512     | 63         | 8           | 266         | 84         | 98.8           | 0.17           | 0.02            | 0.75            | 0.23           |
| <i>Parnassius orleans</i>      | 64863          | 37754        | 13364     | 16212      | 12          | 7251        | 915        | 62.39          | 24.99          | 0.01            | 11.17           | 1.41           |
| <i>Parnassius imperator</i>    | 34570          | 16792        | 11439     | 2857       | 13          | 1033        | 1450       | 84.51          | 8.26           | 0.03            | 2.98            | 4.19           |
| <i>Parnassius simo</i>         | 44481          | 16306        | 12601     | 2223       | 16          | 848         | 618        | 91.67          | 4.99           | 0.03            | 1.90            | 1.38           |
| <i>Parnassius acdestis</i>     | 34096          | 13558        | 11482     | 1145       | 0           | 719         | 212        | 93.91          | 3.35           | 0               | 2.10            | 0.62           |
| <i>Parnassius cephalus</i>     | 44276          | 13316        | 11559     | 907        | 0           | 654         | 196        | 96.03          | 2.04           | 0               | 1.47            | 0.44           |
| <i>Parnassius jacquemontii</i> | 61868          | 9155         | 7427      | 756        | 9           | 614         | 349        | 97.2           | 1.22           | 0.01            | 0.99            | 0.56           |
| <i>Parnassius epaphus</i>      | 41777          | 9835         | 7009      | 1778       | 0           | 630         | 418        | 93.23          | 4.25           | 0               | 1.50            | 1.00           |
| <i>Sericius montelus</i>       | 60642          | 1780         | 1248      | 131        | 6           | 324         | 71         | 99.12          | 0.21           | 0               | 0.53            | 0.11           |
| <i>Papilio polytes</i>         | 30870          | 2017         | 1040      | 109        | 8           | 605         | 255        | 96.83          | 0.35           | 0.02            | 1.95            | 0.82           |

†: nb\_suspects, number of suspect unigenes; nb\_clean, number of unigenes from the focal sample; nb\_lowcov, number of unigenes with low expression levels; nb\_overexp, number of unigenes with high expression levels; nb\_dubious, number of unigenes with close expression levels between focal and alien samples; nb\_contam, number of unigenes from an alien sample; clean\_percent, percentage of unigenes from the focal sample; others similar.

**Table 6.** Overview of the positively selected genes and their quality assessment.

| Positively selected genes                           | Transcripts Per Million (TPM) † |       | Length of Alignment with no Indels | Coverage ‡         |
|-----------------------------------------------------|---------------------------------|-------|------------------------------------|--------------------|
|                                                     | Average                         | STDEV |                                    |                    |
| <b><i>SHF</i> (protein shifted)</b>                 | <b>5.56</b>                     | 5.00  | 966                                | 85.64% (966/1128)  |
| <i>ILF2</i> (interleukin enhancer-binding factor 2) | 14.90                           | 8.54  | 1052                               | 89.68% (1052/1173) |
| <i>CDASE</i> (neutral ceramidase)                   | 8.94                            | 7.35  | 2046                               | 98.27% (2046/2082) |
| <i>PGM2</i> (phosphoglucomutase 2)                  | 11.39                           | 10.03 | 1803                               | 98.85% (1803/1824) |
| <i>PRPF17</i> (pre-mRNA processing factor 17)       | 23.50                           | 15.85 | 1365                               | 79.13% (1365/1725) |

†: Indicates the expression level in each focal sample using the CroCo program. If a transcript has lower TPM value than the threshold (default value: 0.2) in all samples it will then be categorized as a "low coverage" transcript. ‡: Relative coverage for each coding DNA sequence (CDS) of each species compared with CDS of orthologous gene of *Papilio xuthus* and *Papilio machaon*.

**Table 7.** Amino acid substitution specificity information for positively selected sites along the lineage leading to the genus *Parnassius*.

| ILF2                      |   | Amino Acid Position 149 in the CDS of AQY61716 |   |   |   |   |   |   |   |   |   |   |   |   |   |   |   |   |   |   |
|---------------------------|---|------------------------------------------------|---|---|---|---|---|---|---|---|---|---|---|---|---|---|---|---|---|---|
| <i>P. acdestis</i>        | E | R                                              | G | F | T | V | T | A | P | Q | A | A | V | R | V | L | V | T | T | L |
| <i>P. glacialis</i>       | E | R                                              | G | F | T | V | T | A | P | Q | A | A | V | R | V | L | V | T | T | L |
| <i>P. cephalus</i>        | E | R                                              | G | F | T | V | T | A | P | Q | A | A | V | R | V | L | V | T | T | L |
| <i>P. epaphus</i>         | E | R                                              | G | F | T | V | T | A | P | Q | A | A | V | S | V | L | V | T | T | L |
| <i>P. imperator</i>       | E | R                                              | G | F | T | V | T | A | P | Q | A | A | V | R | V | L | V | T | T | L |
| <i>P. jacquemontii</i>    | E | R                                              | G | F | T | V | T | A | P | Q | A | A | V | S | V | L | V | T | T | L |
| <i>P. orleans</i>         | E | R                                              | G | F | T | V | T | A | P | Q | A | A | V | R | V | L | V | T | T | L |
| <i>P. simo</i>            | E | R                                              | G | F | T | V | T | A | P | Q | A | A | V | R | V | L | V | T | T | L |
| <i>Sericinus montelus</i> | E | R                                              | G | F | T | V | S | A | P | G | A | A | V | R | V | L | V | T | T | L |
| <i>papilio polytes</i>    | E | S                                              | G | F | T | V | T | A | A | G | A | A | V | R | V | L | V | T | T | L |
| <i>Papilio xuthus</i>     | E | R                                              | G | F | T | V | T | A | A | G | A | A | V | R | V | L | V | T | T | L |
| <i>Papilio machaon</i>    | E | R                                              | G | F | T | V | T | A | A | G | A | A | V | R | V | L | V | T | T | L |
| <i>Pieris rapae</i>       | E | R                                              | G | F | T | V | T | A | A | S | S | A | V | R | V | L | V | T | T | L |
| <i>Danaus plexippus</i>   | E | S                                              | G | F | T | V | S | T | G | A | A | G | V | S | G | L | V | T | T | L |
| <i>Bombyx mori</i>        | E | R                                              | G | F | T | V | T | G | T | S | A | A | V | S | V | L | I | T | T | L |
| <i>Spodoptera litura</i>  | E | R                                              | G | F | T | V | T | G | P | S | A | A | V | S | V | L | V | T | T | L |
| <i>Manduca sexta</i>      | E | R                                              | G | C | T | V | T | G | A | A | A | A | V | R | L | L | V | T | T | L |

| PRPF17                    |   | Amino acid position 289 in the CDS of XP_004922916 |   |   |   |   |   |   |   |   |   |   |   |   |   |   |   |   |   |   |
|---------------------------|---|----------------------------------------------------|---|---|---|---|---|---|---|---|---|---|---|---|---|---|---|---|---|---|
| <i>P. acdestis</i>        | T | W                                                  | K | G | H | S | K | G | V | A | C | V | R | W | Y | P | S | T | A | H |
| <i>P. glacialis</i>       | T | W                                                  | K | G | H | T | K | G | V | A | C | V | R | W | F | P | S | T | A | H |
| <i>P. cephalus</i>        | T | W                                                  | K | G | H | S | K | G | V | A | C | V | R | W | F | P | S | T | A | H |
| <i>P. epaphus</i>         | T | W                                                  | K | G | H | S | K | G | V | A | C | V | R | W | F | P | S | T | A | H |
| <i>P. imperator</i>       | T | W                                                  | K | G | H | S | K | G | V | A | C | V | R | W | Y | P | S | T | A | H |
| <i>P. jacquemontii</i>    | T | W                                                  | K | G | H | S | K | G | V | A | C | V | R | W | F | P | S | T | A | H |
| <i>P. orleans</i>         | T | W                                                  | K | G | H | T | K | G | V | A | C | V | R | W | F | P | S | T | A | H |
| <i>P. simo</i>            | T | W                                                  | K | G | H | S | K | G | V | A | C | V | R | W | F | P | S | T | A | H |
| <i>Sericinus montelus</i> | T | W                                                  | K | G | H | T | K | G | V | A | A | V | R | W | F | P | R | T | A | H |
| <i>papilio polytes</i>    | T | W                                                  | R | G | H | T | K | G | V | A | A | A | R | W | L | P | A | T | A | H |
| <i>Papilio xuthus</i>     | T | W                                                  | K | G | H | T | K | G | V | A | A | V | R | W | L | P | S | T | A | H |

|                          |   |   |   |   |   |   |   |   |   |   |   |   |   |   |   |   |   |   |   |   |
|--------------------------|---|---|---|---|---|---|---|---|---|---|---|---|---|---|---|---|---|---|---|---|
| <i>Papilio machaon</i>   | T | W | K | G | H | T | K | G | V | A | A | V | R | W | L | P | S | T | A | H |
| <i>Pieris rapae</i>      | T | W | K | G | H | T | K | G | V | A | A | V | R | W | F | P | N | T | A | H |
| <i>Danaus plexippus</i>  | T | W | K | G | H | T | K | G | V | S | A | V | R | W | F | P | R | T | A | H |
| <i>Bombyx mori</i>       | T | W | K | G | H | T | K | G | V | A | A | A | R | W | F | P | S | T | A | H |
| <i>Spodoptera litura</i> | T | W | K | G | H | T | K | G | V | A | A | V | R | W | F | P | G | T | A | H |
| <i>Manduca sexta</i>     | T | W | R | G | H | T | K | G | V | A | A | A | R | W | F | P | R | T | A | H |

| <b>SHF</b>                | Amino acid position 300, 304, 314 in the CDS of ABD36274 |   |   |   |   |   |   |   |   |   |   |   |   |   |   |   |   |   |   |   |
|---------------------------|----------------------------------------------------------|---|---|---|---|---|---|---|---|---|---|---|---|---|---|---|---|---|---|---|
| <i>P. acdestis</i>        | R                                                        | C | R | G | V | N | R | C | R | C | P | A | G | L | G | G | R | H | C | E |
| <i>P. glacialis</i>       | R                                                        | C | R | G | V | N | R | C | R | C | P | A | G | L | G | G | R | H | C | E |
| <i>P. cephalus</i>        | R                                                        | C | R | G | V | N | R | C | R | C | P | A | G | L | G | G | R | H | C | E |
| <i>P. epaphus</i>         | R                                                        | C | R | G | V | N | R | C | R | C | P | A | G | L | G | G | R | H | C | E |
| <i>P. imperator</i>       | R                                                        | C | R | G | V | N | R | C | R | C | P | A | G | L | G | G | R | H | C | E |
| <i>P. jacquemontii</i>    | R                                                        | C | R | G | V | N | R | C | R | C | P | A | G | L | G | G | R | H | C | E |
| <i>P. orleans</i>         | R                                                        | C | R | G | V | N | R | C | R | C | P | A | G | L | G | G | R | H | C | E |
| <i>P. simo</i>            | R                                                        | C | R | G | V | N | R | C | R | C | P | A | G | L | G | G | R | H | C | E |
| <i>Sericanus montelus</i> | R                                                        | C | K | G | V | N | K | C | R | C | P | P | G | L | G | G | N | H | C | E |
| <i>papilio polytes</i>    | R                                                        | C | K | G | V | N | K | C | R | C | P | P | G | L | G | G | D | H | C | E |
| <i>Papilio xuthus</i>     | R                                                        | C | K | G | V | N | K | C | R | C | P | P | G | L | G | G | D | H | C | E |
| <i>Papilio machaon</i>    | R                                                        | C | K | G | V | N | K | C | R | C | P | P | G | L | G | G | D | H | C | E |
| <i>Pieris rapae</i>       | R                                                        | C | K | G | V | N | K | C | R | C | P | P | G | L | G | G | N | H | C | E |
| <i>Danaus plexippus</i>   | R                                                        | C | K | G | V | N | K | C | R | C | P | A | G | L | G | G | N | H | C | E |
| <i>Bombyx mori</i>        | R                                                        | C | V | G | V | N | K | C | R | C | P | A | G | L | G | G | D | H | C | E |
| <i>Spodoptera litura</i>  | R                                                        | C | K | G | V | N | K | C | R | C | P | V | G | L | G | G | N | H | C | E |
| <i>Manduca sexta</i>      | R                                                        | C | K | G | V | N | K | C | R | C | P | A | G | L | G | G | N | H | C | E |

| <b>CDASE</b>        | Amino acid position 307 in the CDS of XP_004929418 |   |   |   |   |   |   |   |   |   |   |   |   |   |   |   |   |   |   |   |
|---------------------|----------------------------------------------------|---|---|---|---|---|---|---|---|---|---|---|---|---|---|---|---|---|---|---|
| <i>P. acdestis</i>  | K                                                  | E | R | C | F | A | S | G | P | G | V | D | M | F | D | S | T | R | I | I |
| <i>P. glacialis</i> | K                                                  | E | R | C | F | A | S | G | P | G | V | D | M | F | D | S | T | R | I | I |
| <i>P. cephalus</i>  | K                                                  | E | R | C | F | A | S | G | P | G | V | D | M | F | D | S | T | R | I | I |
| <i>P. epaphus</i>   | K                                                  | E | R | C | F | A | S | G | P | G | V | D | M | F | D | S | T | R | I | I |
| <i>P. imperator</i> | K                                                  | E | R | C | F | A | S | G | P | G | V | D | M | F | D | S | T | R | I | I |

|                           |   |   |   |   |   |   |   |   |   |   |   |   |   |   |   |   |   |   |   |   |
|---------------------------|---|---|---|---|---|---|---|---|---|---|---|---|---|---|---|---|---|---|---|---|
| <i>P. jacquemontii</i>    | K | E | R | C | F | A | S | G | P | G | V | D | M | F | D | S | T | R | I | I |
| <i>P. orleans</i>         | K | E | R | C | F | A | S | G | P | G | V | D | M | F | D | S | T | R | I | I |
| <i>P. simo</i>            | K | E | R | C | F | A | S | G | P | G | V | D | M | F | D | S | T | R | I | I |
| <i>Sericanus montelus</i> | K | E | R | C | F | A | A | G | P | G | R | D | M | F | D | S | T | R | I | I |
| <i>papilio polytes</i>    | K | E | R | C | F | A | S | G | P | G | S | D | M | F | D | S | T | R | I | I |
| <i>Papilio xuthus</i>     | K | E | R | C | F | A | S | G | P | G | R | D | M | F | D | S | T | R | I | I |
| <i>Papilio machaon</i>    | K | E | R | C | F | A | S | G | P | G | R | D | M | F | D | S | T | R | I | I |
| <i>Pieris rapae</i>       | K | E | S | C | F | A | S | G | P | G | R | D | M | F | E | S | T | K | I | I |
| <i>Danaus plexippus</i>   | K | E | S | C | F | A | S | G | P | G | R | D | M | F | E | S | T | L | I | I |
| <i>Bombyx mori</i>        | K | E | R | C | F | A | S | G | P | G | R | D | M | F | D | S | T | R | I | I |
| <i>Spodoptera litura</i>  | K | E | S | C | F | A | S | G | P | G | R | D | M | F | D | S | T | S | I | I |
| <i>Manduca sexta</i>      | K | E | R | C | F | A | S | G | P | G | R | D | M | F | E | S | T | K | I | I |

| CDASE                     | Amino acid position 605 in the CDS of XP_004929418 |   |   |   |   |   |   |   |   |   |   |   |   |   |   |   |   |   |   |   |
|---------------------------|----------------------------------------------------|---|---|---|---|---|---|---|---|---|---|---|---|---|---|---|---|---|---|---|
| <i>P. acdestis</i>        | S                                                  | G | H | P | R | N | S | V | R | A | G | R | W | L | A | A | V | E | R | L |
| <i>P. glacialis</i>       | S                                                  | G | H | P | R | N | S | A | R | A | G | R | W | L | A | A | V | E | R | L |
| <i>P. cephalus</i>        | S                                                  | G | H | P | R | N | S | V | R | A | G | R | W | F | A | A | V | E | R | L |
| <i>P. epaphus</i>         | S                                                  | G | H | P | R | N | S | V | R | A | G | R | W | L | A | A | V | E | R | L |
| <i>P. imperator</i>       | S                                                  | G | H | P | R | N | S | V | R | A | G | R | W | L | A | A | V | E | R | L |
| <i>P. jacquemontii</i>    | S                                                  | G | H | P | R | N | S | V | R | A | G | R | W | L | A | A | V | E | R | L |
| <i>P. orleans</i>         | S                                                  | G | H | P | R | N | S | V | R | A | G | R | W | F | A | A | V | E | R | L |
| <i>P. simo</i>            | S                                                  | G | H | P | R | N | S | L | R | A | G | R | W | F | A | A | V | E | R | L |
| <i>Sericanus montelus</i> | S                                                  | G | H | P | R | N | S | A | R | H | G | R | W | Y | A | T | V | E | R | L |
| <i>papilio polytes</i>    | S                                                  | G | H | P | R | N | S | I | R | H | G | R | W | Y | A | A | V | E | R | L |
| <i>Papilio xuthus</i>     | S                                                  | G | H | P | R | N | S | V | S | H | G | R | W | Y | A | A | V | E | R | L |
| <i>Papilio machaon</i>    | S                                                  | G | H | P | R | N | S | V | R | H | G | R | W | Y | A | A | V | E | R | L |
| <i>Pieris rapae</i>       | S                                                  | G | H | P | R | N | S | I | R | H | G | R | W | Y | S | T | V | E | K | L |
| <i>Danaus plexippus</i>   | S                                                  | G | H | P | S | N | S | P | R | H | G | R | W | F | L | S | V | E | R | L |
| <i>Bombyx mori</i>        | S                                                  | G | H | P | R | N | S | V | R | H | G | R | W | Y | M | A | V | E | K | L |
| <i>Spodoptera litura</i>  | S                                                  | G | H | P | R | N | S | I | R | H | G | R | W | Y | A | T | V | E | R | L |
| <i>Manduca sexta</i>      | S                                                  | G | H | P | R | N | S | I | S | H | G | R | W | Y | A | T | V | E | S | L |



| PGM2                      | Amino acid position 504 in the CDS of XP_004929437 |   |   |   |   |   |   |   |   |   |   |   |   |   |   |   |   |   |   |   |
|---------------------------|----------------------------------------------------|---|---|---|---|---|---|---|---|---|---|---|---|---|---|---|---|---|---|---|
| <i>P. acdestis</i>        | E                                                  | S | G | V | Y | P | K | K | M | G | S | T | G | M | V | Q | L | N | D | F |
| <i>P. glacialis</i>       | A                                                  | S | G | V | Y | P | K | K | I | G | C | T | E | M | V | Q | L | N | D | F |
| <i>P. cephalus</i>        | E                                                  | S | G | V | Y | P | K | K | M | G | S | T | E | M | V | Q | L | N | D | F |
| <i>P. epaphus</i>         | E                                                  | S | G | V | Y | P | K | K | M | G | S | T | E | M | V | Q | L | N | D | F |
| <i>P. imperator</i>       | E                                                  | S | G | V | Y | P | K | K | M | G | S | T | G | M | V | Q | L | N | D | F |
| <i>P. jacquemontii</i>    | E                                                  | S | G | V | Y | P | K | K | M | G | S | T | E | M | V | Q | L | N | D | F |
| <i>P. orleans</i>         | E                                                  | S | G | V | Y | P | K | K | M | G | S | T | E | M | V | Q | L | N | D | F |
| <i>P. simo</i>            | E                                                  | S | G | V | Y | P | K | K | M | G | S | T | E | M | V | Q | L | N | D | F |
| <i>Seracinus montelus</i> | G                                                  | S | G | V | Y | P | K | K | V | G | S | C | E | I | E | L | V | N | D | F |
| <i>papilio polytes</i>    | G                                                  | S | G | V | Y | P | K | K | V | G | S | C | E | I | V | H | L | N | D | F |
| <i>Papilio xuthus</i>     | G                                                  | S | G | V | Y | P | K | K | V | G | S | C | E | I | V | H | M | N | D | F |
| <i>Papilio machaon</i>    | G                                                  | S | G | V | Y | P | K | K | V | G | S | C | E | M | V | H | M | N | D | F |
| <i>Pieris rapae</i>       | G                                                  | K | G | L | Y | P | K | T | V | G | P | C | E | V | V | F | V | N | D | F |
| <i>Danaus plexippus</i>   | G                                                  | P | G | E | Y | P | S | V | V | G | P | C | E | V | T | F | M | N | D | F |
| <i>Bombyx mori</i>        | G                                                  | P | G | Q | Y | P | R | R | V | G | S | C | G | V | T | R | V | T | D | F |
| <i>Spodoptera litura</i>  | G                                                  | P | G | Q | Y | P | K | K | V | G | D | C | E | I | V | F | V | N | D | F |
| <i>Manduca sexta</i>      | G                                                  | P | G | E | Y | P | S | Q | V | G | S | H | E | M | V | F | M | N | D | F |
